# Supplementary material
Source: PubMed Central journal article supplement (PMC3995463)

**Supplemental Figure 1.** Microarray expression analysis of human APOA4 in steatosis and steatohepatitis. APOA4 expression data was retrieved from GEO datasets (<http://www.ncbi.nlm.nih.gov/geo/>). Probe identification numbers for APOA4 are shown. Each dot represents an individual tissue sample. Values on y-axis represent signal intensity. A. GEO accession GSE33814 (Platform: Illumina HumanWG-6 v3.0). B. GSE48452 (Platform: Affymetrix Human Gene 1.1 ST). C. GSE37031 (Platform: GPL14877, Affymetrix Human Genome U133 Plus 2.0). D. GSE28619 (Platform: GPL570, Affymetrix Human Genome U133 Plus 2.0).

Supplemental Figure 1.

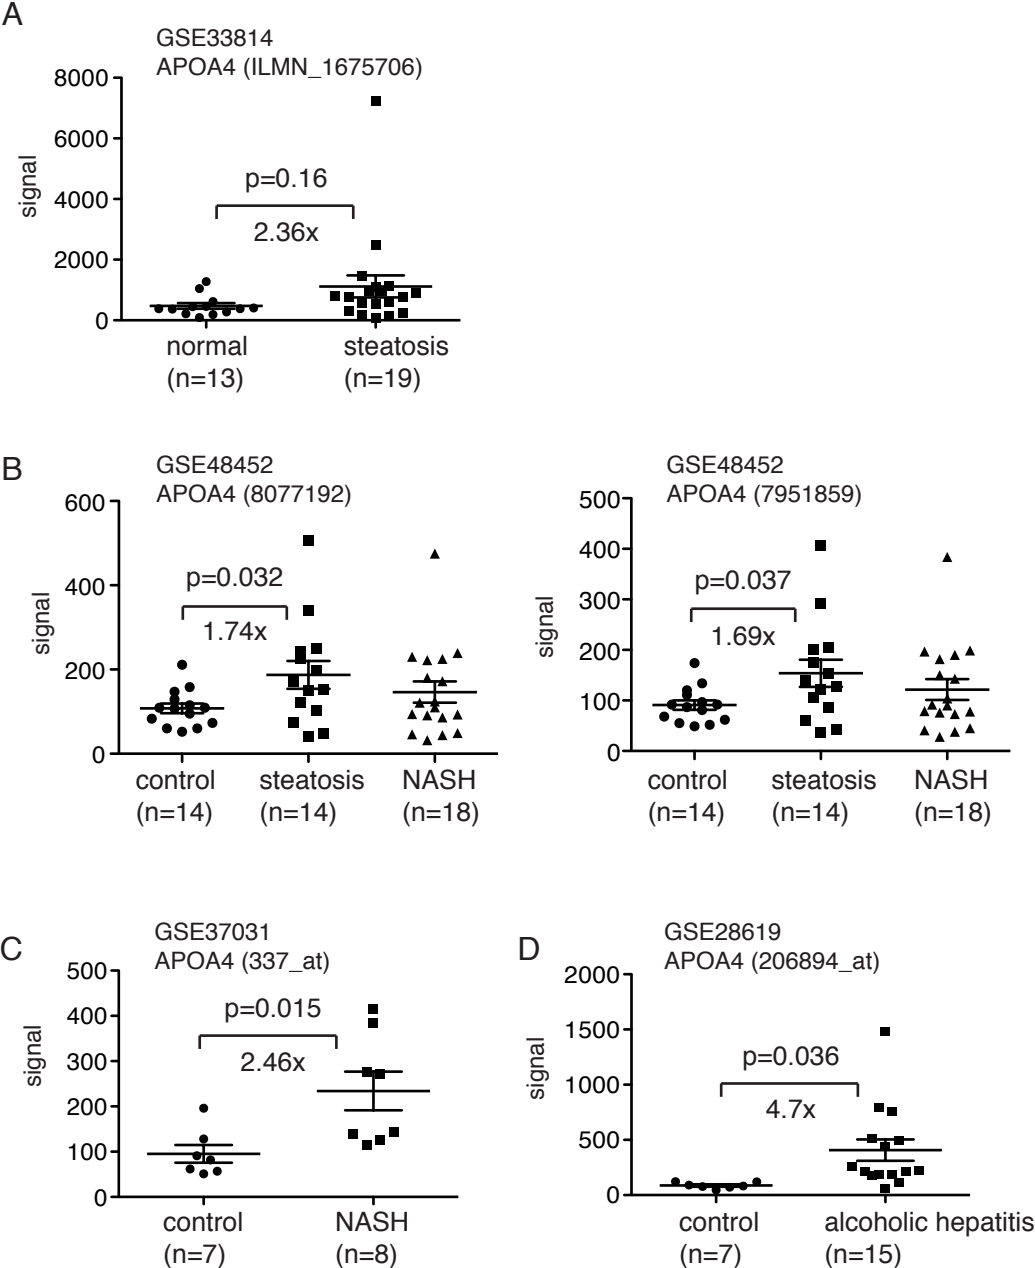

Supplement: supp_M045104_jlr.M045104-1.pdf [file supp_M045104_jlr.M045104-1.pdf]
